# Supplementary material
Source: PubMed Central journal article supplement (PMC4323766)
Supplement: NIHMS659365-supplement-01.pdf [file NIHMS659365-supplement-01.pdf]

## Supplementary Table and Figures

**Institutional Diagnosis**

|                                             |           |              |
|---------------------------------------------|-----------|--------------|
| Malignant glioma, unclassified              | 3         | 5.0          |
| Anaplastic astrocytoma                      | 39        | 65.0         |
| Other eligible diagnoses                    | 3         | 5.0          |
| Ineligible diagnosis (Astrocytoma, grade 1) | 1         | 1.7          |
| Glioblastoma multiforme                     | 14        | 23.3         |
| <b>Total</b>                                | <b>60</b> | <b>100.0</b> |

**Central Review**

|                                               |           |              |
|-----------------------------------------------|-----------|--------------|
| Anaplastic astrocytoma                        | 22        | 36.7         |
| Discordant (JPA, grade 1)                     | 6         | 10.0         |
| Discordant (Astrocytoma, grade 2)             | 13        | 21.7         |
| Discordant (Low-grade glioma, no consensus)   | 1         | 1.7          |
| Discordant (Desmoplastic glioma, grade 2)     | 1         | 1.7          |
| Glioblastoma multiforme                       | 12        | 20.0         |
| Other (Anaplastic mixed glioma, grade 3)      | 2         | 3.3          |
| Other (Anaplastic oligodendroglioma, grade 3) | 2         | 3.3          |
| Ineligible diagnosis                          | 1         | 1.7          |
| <b>Total</b>                                  | <b>60</b> | <b>100.0</b> |

Supplementary Table I. Tumor Pathology: Institutional Diagnosis versus Central Review

Supplementary Table and Figures

**A**

### Progression-free Survival

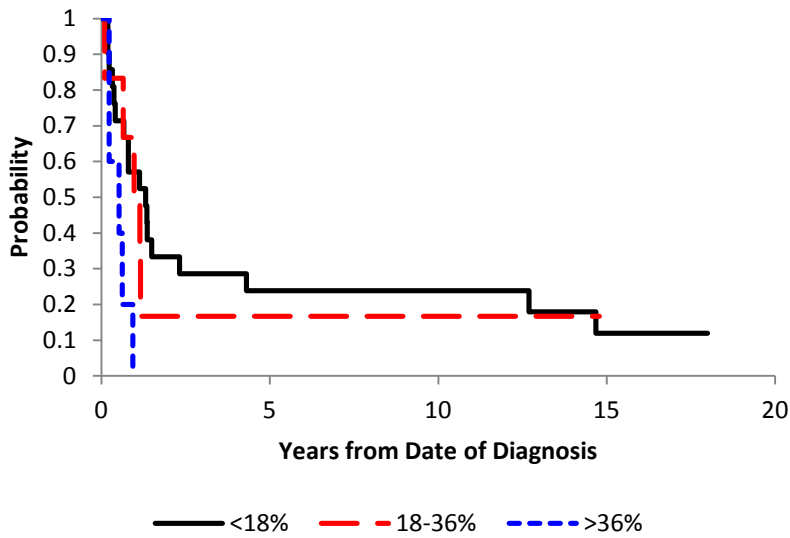

**B**

### Overall Survival

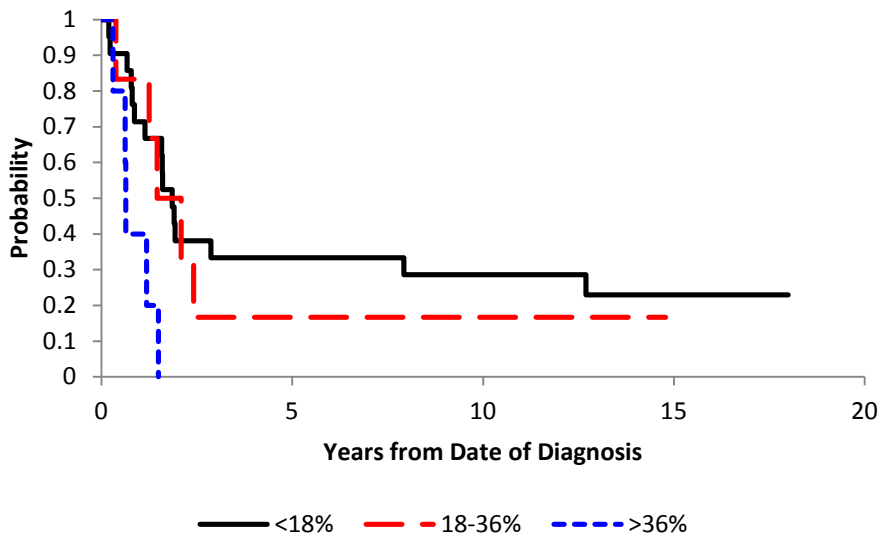

Supplementary Table and Figures

**Supplementary Figure 1**

Proliferation indices (MIB-1 scores) and survival curves for (A) PFS ( $p=0.031$ ) and (B) OS ( $p=0.012$ ). MIB scores were stratified into three groups: 0 (0-18%, solid line), 1 (18-36%, dashed line) and 2 ( $> 36\%$ , dotted line).

## Supplementary Table and Figures

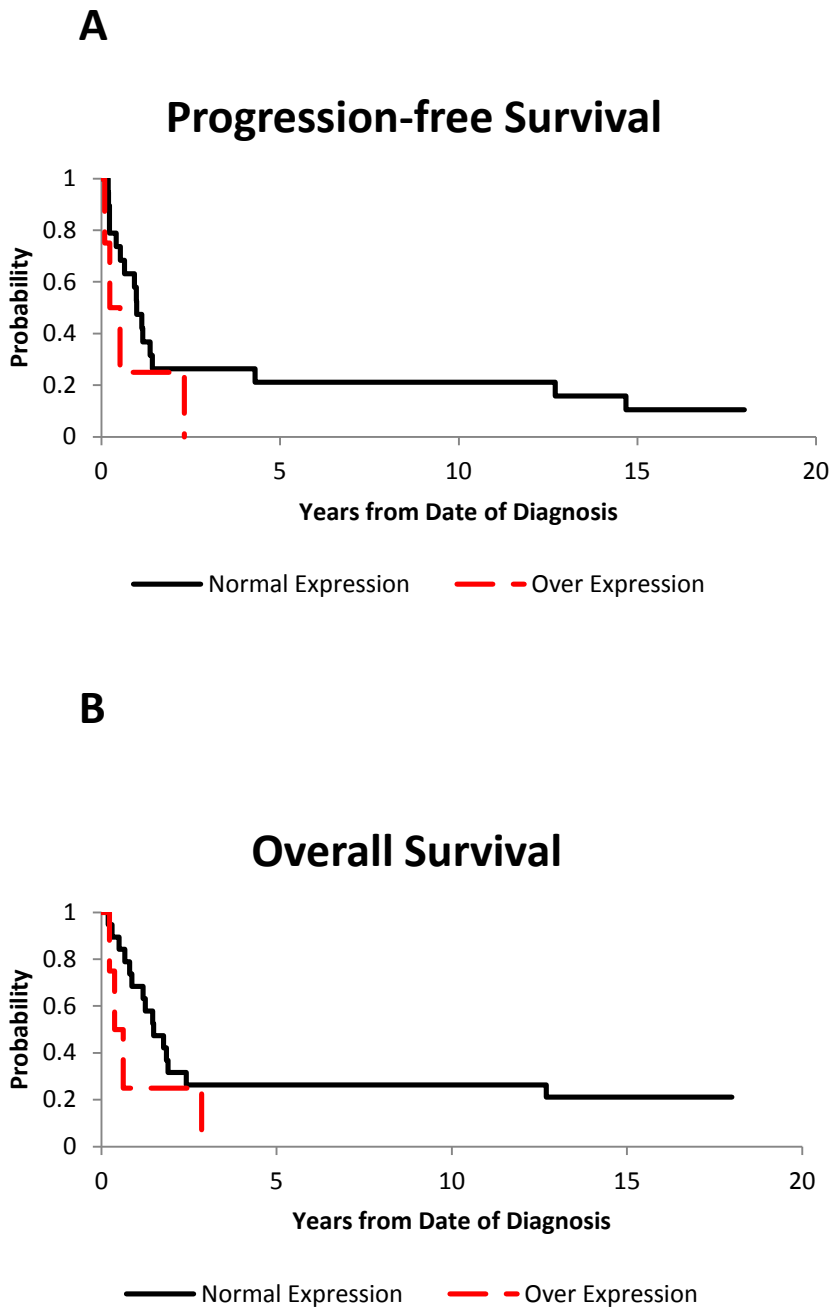**Supplementary Figure 2**

MGMT expression status and survival curves for (A) PFS ( $p=0.19$ ) and (B) OS ( $p=0.13$ ). MGMT expression was stratified into two groups: 0 (no over-expression or normal, MGMT score of 0, 1 or 2, black line) and 1 (over-expression, MGMT score of 3 or 4, dotted line).

## Supplementary Table and Figures

**A****Progression-free Survival**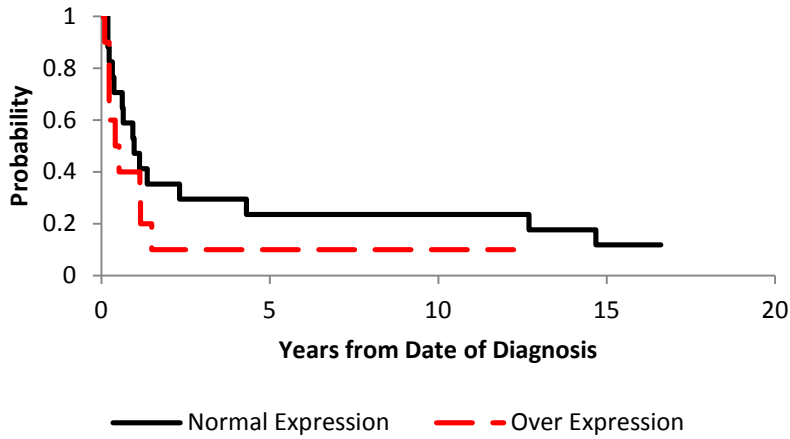**B****Overall Survival**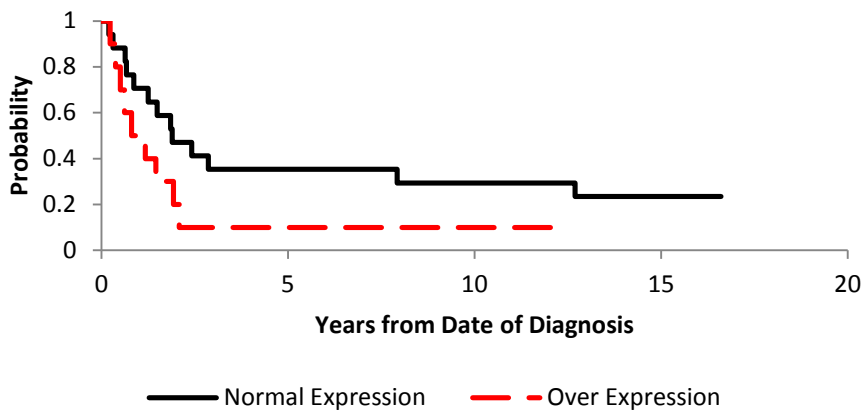**Supplementary Figure 3**

p53 score and survival curves for (A) PFS ( $p=0.27$ ) and (B) OS ( $p=0.099$ ). p53 scores were stratified into two groups: 0 (no over-expression or normal, p53 score of 0, 1 or 2, black line) or 1 (over-expression, p53 score of 3 or 4, dotted line).
